# Supplementary material for: Copper–zinc oxide interface as a methanol-selective structure in Cu–ZnO catalyst during catalytic hydrogenation of carbon dioxide to methanol
Source: Royal Society of Chemistry journal article supplement (doi:10.1039/d2cy00224h), 2022-01-01
Supplement: d2cy00224h1.pdf [file d2cy00224h1.pdf]

**Electronic Supplementary Information (ESI) for:**

**Copper-zinc oxide interface as a methanol-  
selective structure in Cu-ZnO catalyst during  
catalytic hydrogenation of carbon dioxide to  
methanol**

*Saeed Saedy<sup>a,1,\*</sup>, Mark A. Newton<sup>b</sup>, Maxim Zabilskiy<sup>a</sup>, Jin Hee Lee<sup>a,2</sup>, Frank Krumeich<sup>c</sup>, Marco Ranocchiari<sup>a</sup>, Jeroen A. van Bokhoven<sup>a,b,\*</sup>*

a) Laboratory for Catalysis and Sustainable Chemistry, Paul Scherrer Institute, 5232 Villigen, Switzerland.

b) Institute for Chemistry and Bioengineering, ETH Zurich, Vladimir-Prelog-Weg 1, 8093 Zürich, Switzerland.

c) Laboratory of Inorganic Chemistry, Institute for Chemical and Bioengineering, ETH Zurich, 8093 Zurich, Switzerland.

\*Corresponding authors; E-mail address: [jeroen.vanbokhoven@chem.ethz.ch](mailto:jeroen.vanbokhoven@chem.ethz.ch) ,  
[s.saedy@tudelft.nl](mailto:s.saedy@tudelft.nl)

<sup>1</sup>Present address: Department of Chemical Engineering, Delft University of Technology, van der Maasweg 9, 2629 HZ Delft, The Netherlands.

<sup>2</sup>Present address: Center for Environment & Sustainable Resources, Korea Research Institute of Chemical Technology, 34114 Daejeon, South Korea.

## Calculation of the methanol activity normalized by the surface copper atoms

Calvin et al.<sup>1</sup> derived an equation to determine the coordination number of a particle as a function of its radius (R):

$$N_{nano} = \left[1 - \frac{3}{4}\left(\frac{r}{R}\right) + \frac{1}{16}\left(\frac{r}{R}\right)^3\right]N_{bulk} \quad (1)$$

where  $r$  is the average distance between the nearest-neighbor atoms.

The apparent coordination numbers of metal particles obtained from EXAFS analysis are smaller than the actual value for small clusters, and this deviation becomes more significant at elevated temperatures for small particles,<sup>2</sup> especially for low Debye temperature materials such as copper. Clausen et al.<sup>2</sup> demonstrated a linear behavior of the deviation of the apparent coordination number from the actual value, for copper particles up to 7 nm through the use of molecular dynamics simulations. The curve derived by Clausen et al. is employed for correction of apparent coordination numbers. Accordingly, the 1<sup>st</sup> shell coordination number of PCVD and CA samples were corrected to 9.0 and 8.9, respectively. Also, the 1<sup>st</sup> shell coordination number of IMP sample was corrected to 8.0.

Then, the average copper particle size were calculated using the corrected coordination numbers and equation (1). As an example, substituting the  $N_{nano} = 9$ ,  $N_{bulk} = 12$ , and  $r = 2.51 \text{ \AA}$  for PCVD sample and solving equation (1), results in following:

$$9 = \left[1 - \frac{3}{4}\left(\frac{2.51}{R}\right) + \frac{1}{16}\left(\frac{2.51}{R}\right)^3\right]12 \rightarrow R_1 \approx -0.7 \text{ \AA}, R_2 \approx 0.8 \text{ \AA} \text{ and } R_3 \approx 7.5 \text{ \AA}$$

Among the obtained values, 7.5 Å is physically meaningful. Hence, the average diameter of copper particles in PCVD sample can be estimated about 15 Å (1.5 nm). In the same way, the average size of copper particles in the CA and IMP samples is estimated to be ca. 14.4 Å and 11 Å, respectively. It is worth to note that the average particle size obtained for CA sample is similar to the observed particle size using HAADF-STEM images (**Figure S5**). In the case of PCVD and IMP samples, we cannot use the STEM images for validation, since we are not able to differentiate the copper and zinc oxide particles. The dispersion of copper ( $D_{Cu}$ ) as function of particle diameter can be calculated using the following relation<sup>3</sup>:

$$D_{Cu} = 6 \frac{v_m / a_m}{d} \quad (2)$$

where  $d$  is the average diameter of cluster (Å) and for copper  $v_m = 11.83 \text{ \AA}^3$  and  $a_m = 6.85 \text{ \AA}^2$ .

Accordingly, the copper dispersion using equation (2) and the average diameter calculated using equation (1) can be calculated as follow:

$$D_{Cu\_PCVD} = 6 \times \frac{11.83 / 6.85}{15} = 0.69$$

In the same way, the copper dispersion of CA and IMP samples were estimated about 0.71 and 0.92, respectively.

Accordingly, the methanol activity of the catalysts normalized by the surface copper atoms was calculated by dividing the copper productivity (in  $\mu\text{mol}\cdot\text{g}^{-1}_{\text{Cu}}\cdot\text{min}^{-1}$ ) by copper dispersion of each catalyst:

$$\text{Methanol activity of PCVD catalyst: } \frac{930}{0.69} = 1372 \mu\text{mol} \cdot \text{g}_{\text{Cu\_surface}}^{-1} \cdot \text{min}^{-1}$$

In the same way, the activity for methanol production of the catalysts, normalized by the surface copper atoms of CA and IMP samples, were calculated as  $288 \mu\text{mol}\cdot\text{g}^{-1}_{\text{Cu\_surface}}\cdot\text{min}^{-1}$  and  $865 \mu\text{mol}\cdot\text{g}^{-1}_{\text{Cu\_surface}}\cdot\text{min}^{-1}$ , respectively. The methanol productivity of these samples is  $200 \mu\text{mol}\cdot\text{g}^{-1}_{\text{Cu}}\cdot\text{min}^{-1}$  and  $765 \mu\text{mol}\cdot\text{g}^{-1}_{\text{Cu}}\cdot\text{min}^{-1}$  for CA and IMP catalysts respectively.

The results of calculation of the methanol activity normalized by the surface copper atoms are summarized in **Table S3**.

## References

1. Calvin, S.; Miller, M. M.; Goswami, R.; Cheng, S.-F.; Mulvaney, S. P.; Whitman, L. J.; Harris, V. G., Determination of crystallite size in a magnetic nanocomposite using extended x-ray absorption fine structure. *Journal of Applied Physics* **2003**, *94* (1), 778-783.
2. Clausen, B. S.; Grabaek, L.; Topsoe, H.; Hansen, L. B.; Stoltze, P.; Norskov, J. K.; Nielsen, O. H., A New Procedure for Particle Size Determination by EXAFS Based on Molecular Dynamics Simulations. *Journal of Catalysis* **1993**, *141* (2), 368-379.
3. Mestl, G.; Knözinger, H., Characterization of Solid Catalysts: Physical Properties: Structure and Morphology: Vibrational Spectroscopies. In *Handbook of Heterogeneous Catalysis*, 2008; Vol. 2-5, pp 539-574.

**Table S1****Table S1.** The chemical composition of different ZnO/Cu/Al<sub>2</sub>O<sub>3</sub> catalysts synthesized in this study.

| Sample name | Synthesis method | Zinc deposition time (h) | Impregnated copper wt% | Deposited zinc wt% | Zn:Cu atomic ratio |
|-------------|------------------|--------------------------|------------------------|--------------------|--------------------|
| *CA         | impregnation     | 0                        | 4.7                    | 0                  | 0                  |
| CZA1        | PCVD             | 0.5                      | 4.5                    | 0.2                | 0.05               |
| CZA2        | PCVD             | 1                        | 4.5                    | 0.8                | 0.18               |
| *PCVD       | PCVD             | 2                        | 4.5                    | 2.2                | 0.50               |
| CZA3        | PCVD             | 3                        | 4.7                    | 3.3                | 0.72               |
| CZA4        | PCVD             | 6                        | 4.7                    | 5.2                | 1.14               |
| CZA5        | PCVD             | 9                        | 4.7                    | 7.5                | 1.64               |
| *IMP        | impregnation     | n.a.                     | 4.5                    | 2.2                | 0.50               |

\* These three samples were named differently from the rest of samples aiming at easier use in the main text.

**Table S2****Table S2.** The comparison of the methanol performance of PCVD catalyst with an industrial sample.

| Catalyst   | Process temperature (°C) | Process pressure (bar) | Methanol rate ( $\mu\text{mol}\cdot\text{g}_{\text{Cu}}^{-1}\cdot\text{min}^{-1}$ ) | Methanol selectivity (%) |
|------------|--------------------------|------------------------|-------------------------------------------------------------------------------------|--------------------------|
| Industrial | 260                      | 15                     | 552                                                                                 | 48                       |
| Industrial | 260                      | 50                     | 2020                                                                                | 41                       |
| PCVD       | 250                      | 30                     | 930                                                                                 | 65                       |

\* Due to different experimental conditions (especially the reaction pressure) and the different compositions of the catalysts, any conclusion cannot be drawn unequivocally.

**Table S3****Table S3.** The summary of the BET surface area measurements.

|                                                                  | Pristine alumina | CA   | PCVD | IMP  |
|------------------------------------------------------------------|------------------|------|------|------|
| BET surface area ( $\text{m}^2\cdot\text{g}^{-1}$ )              | 142              | 123  | 113  | 106  |
| BJH pore volume ( $\text{cm}^3\cdot\text{g}^{-1}$ ) <sup>a</sup> | 0.24             | 0.22 | 0.20 | 0.19 |
| BJH average pore width ( $\text{\AA}$ ) <sup>b</sup>             | 61               | 58   | 63   | 57   |

- the adsorption volume of pores with the width of 17 - 3000  $\text{\AA}$ .
- the adsorption average pore width ( $4V/A$ ).

**Table S4**

**Table S4.** The apparent and corrected 1<sup>st</sup> shell coordination number of copper nanoparticles, copper nanoparticle diameter, copper dispersion, and methanol activity normalized by the surface copper atoms.

| Sample | Apparent 1 <sup>st</sup> shell CN | Corrected 1 <sup>st</sup> shell CN | Average copper particle size (Å) | Copper dispersion | Methanol activity ( $\mu\text{mol}\cdot\text{g}^{-1}_{\text{Cu\_surface}}\cdot\text{min}^{-1}$ ) |
|--------|-----------------------------------|------------------------------------|----------------------------------|-------------------|--------------------------------------------------------------------------------------------------|
| PCVD   | 8.0                               | 9.0                                | 15.0                             | 0.69              | 1372                                                                                             |
| CA     | 7.9                               | 8.9                                | 14.4                             | 0.71              | 288                                                                                              |
| IMP    | 6.7                               | 8.0                                | 11.0                             | 0.92              | 865                                                                                              |

**Table S5**

**Table S5:** Structural and statistical parameters derived from the fitting of  $k^3$ -weighted copper *K*-edge EXAFS for the CA, PCVD, and IMP catalysts; pressurized to 15 bar after reduction (at 250°C under 25 vol. % of hydrogen in helium).  $K_{\text{min}}=3$ ,  $K_{\text{max}}=11.5$ , AFAC = 0.9\*

| Sample | Shell | CN   | R (Å) | DW ( $2\sigma^2$ ) | Fitting parameters |
|--------|-------|------|-------|--------------------|--------------------|
| CA     | Cu-Cu | 8.3  | 2.51  | 0.031              | $E_F = -8.4$       |
|        | Cu-O  | n.a. | n.a.  | n.a.               | R% = 47            |
| PCVD   | Cu-Cu | 8.5  | 2.51  | 0.033              | $E_F = -7.9$       |
|        | Cu-O  | n.a. | n.a.  | n.a.               | R% = 44            |
| IMP    | Cu-Cu | 8    | 2.50  | 0.033              | $E_F = -7.7$       |
|        | Cu-O  | 0.7  | 1.99  | 0.007              | R% = 36            |

\*AFAC: related to the proportion of electrons undergoing scattering post absorption that contribute to the EXAFS.

CN: Coordination number ( $\pm 10\%$  of stated value)

DW: Debye – Waller factor where  $\sigma$  is the root mean square inter-nuclear separation (Å)

$E_F$ : Edge position relative to Vacuum zero (Fermi energy, eV)

R(%) (fit agreement factor):  $\left( \frac{\int [c^T - c^E] k^3 dk}{\int [c^E] k^3 dk} \right) \times 100$ , where  $c^T$  and  $c^E$  are the theoretical and experimental EXAFS and  $k$  is the photoelectron wave vector.

**Table S6**

**Table S6:** Structural and statistical parameters derived from the fitting of  $k^3$ -weighted zinc  $K$ -edge EXAFS for the PCVD and IMP catalysts; pressurized to 15 bar after reduction (at 250°C under 25 vol. % of hydrogen in helium).  $K_{\min}=2.5$ ,  $K_{\max}=10.5$ , AFAC = 0.9\*

| Sample | Shell | CN   | R (Å) | DW ( $2\sigma^2$ ) | Fitting parameters            |
|--------|-------|------|-------|--------------------|-------------------------------|
| PCVD   | Zn-O  | 2.6  | 1.9   | 0.007              | $E_F = -2.85$<br>$R(\%) = 52$ |
|        | Zn-O  | 1.5  | 2.07  | 0.005              |                               |
|        | Zn-Zn | 0.9  | 3.16  | 0.015              |                               |
| IMP    | Zn-O  | 1.4  | 1.91  | 0.015              | $E_F = -1.5$<br>$R(\%) = 55$  |
|        | Zn-O  | 2.1  | 1.97  | 0.015              |                               |
|        | Zn-Al | n.a. | n.a.  | n.a.               |                               |

\*AFAC: related to the proportion of electrons undergoing scattering post absorption that contribute to the EXAFS.

CN: Coordination number ( $\pm 10\%$  of stated value)

DW: Debye – Waller factor where  $\sigma$  is the root mean square inter-nuclear separation (Å)

$E_F$ : Edge position relative to Vacuum zero (Fermi energy, eV)

R(%) (fit agreement factor):  $\left( \frac{\int [c^T - c^E] k^3 dk}{\int [c^E] k^3 dk} \right) \times 100$ , where  $c^T$  and  $c^E$  are the theoretical and experimental EXAFS and  $k$  is the photoelectron wave vector.

**Figure S1**

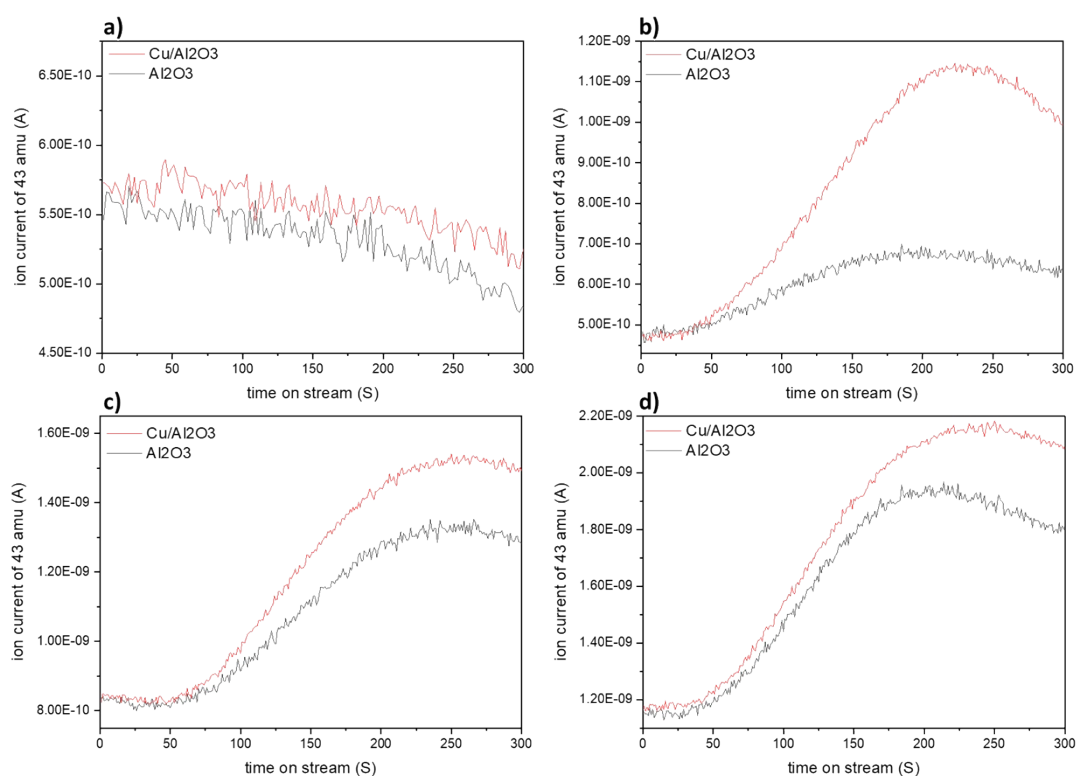

**Figure S1.** The base-line normalized ion current of the 43 amu corresponding to the concentration of acetylacetone in the PCVD reactor outlet for experiment temperature of a) 140°C, b) 150°C, c) 160°C, and d) 170°C. The drastic increase of ion current at 150°C suggests that the copper particles catalyze the reaction between Zn(acac)<sub>2</sub> and hydrogen, leading to preferential deposition of zinc on the copper phase. In contrast, the ion current increase in the case of pristine Al<sub>2</sub>O<sub>3</sub> is insignificant due to the lack of catalyst. However, the ion current increase at higher temperatures suggests that the zinc deposition on pristine Al<sub>2</sub>O<sub>3</sub> is likely, and the temperatures above 150°C should be avoided for PCVD of zinc on copper.

Figure S2

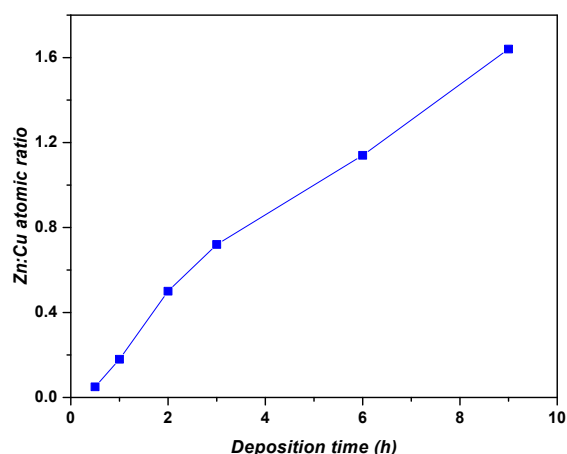

Figure S2. Zinc to copper atomic ratio as a function of zinc deposition time.

Figure S3

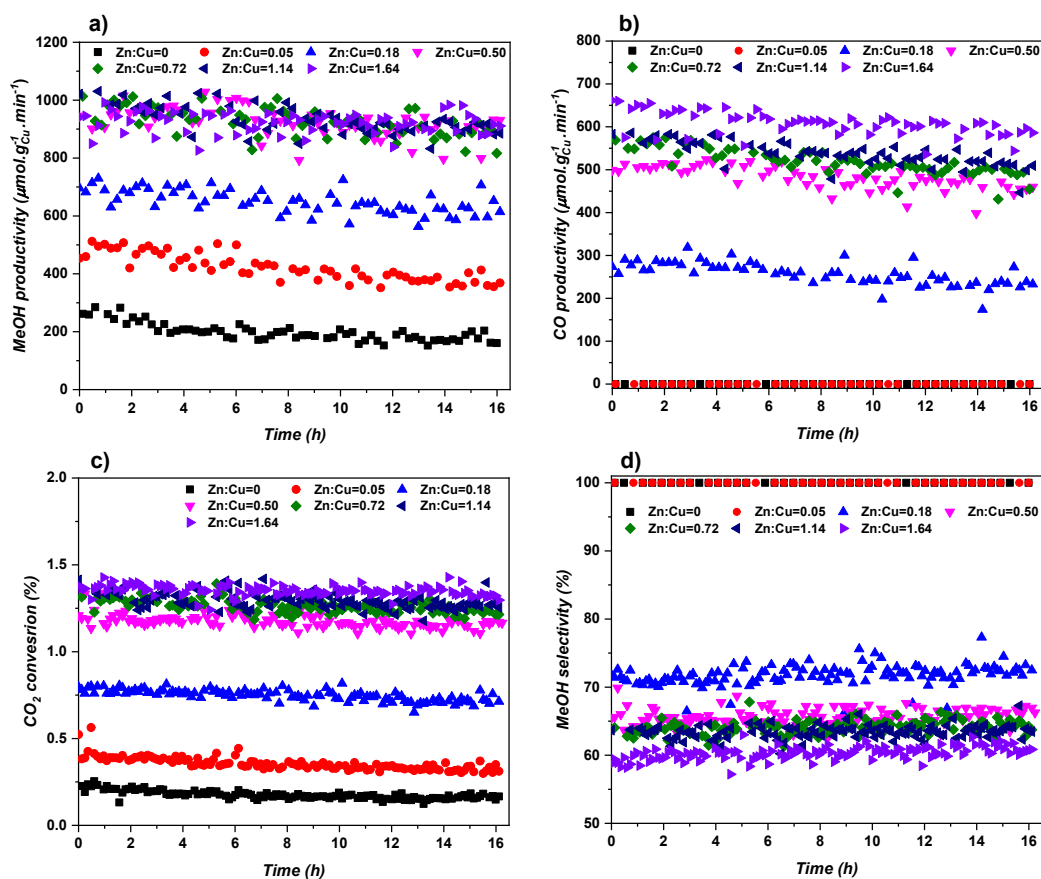

Figure S3. Carbon dioxide hydrogenation activity of samples synthesized with preferential chemical vapor deposition as a function of reaction time; a) methanol productivity, b) carbon monoxide productivity, c) carbon dioxide conversion, and d) methanol selectivity. Activity and selectivity during carbon dioxide hydrogenation were measured under steady-state operation (i.e. after the reaction was carried out for 3 hours before measurements).



**Figure S4**

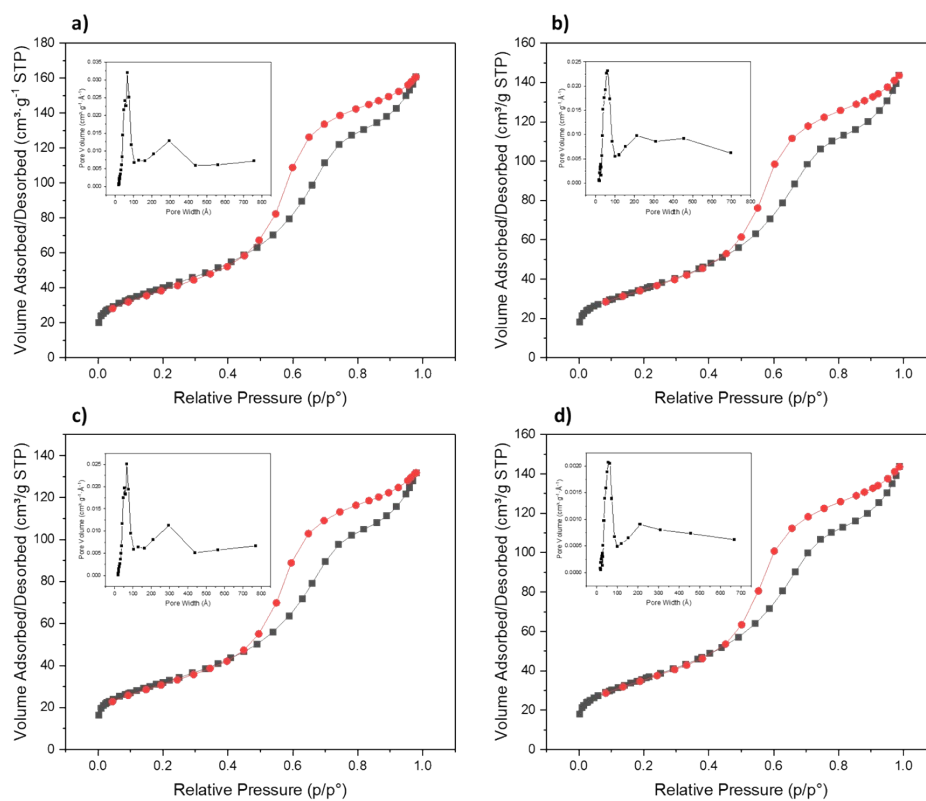

**Figure S4.** The nitrogen adsorption/desorption isotherms and pore size distribution curves (inset) of a) pristine Al<sub>2</sub>O<sub>3</sub>, b) CA, c) PCVD, and d) IMP samples, obtained using BET measurement.

**Figure S5**

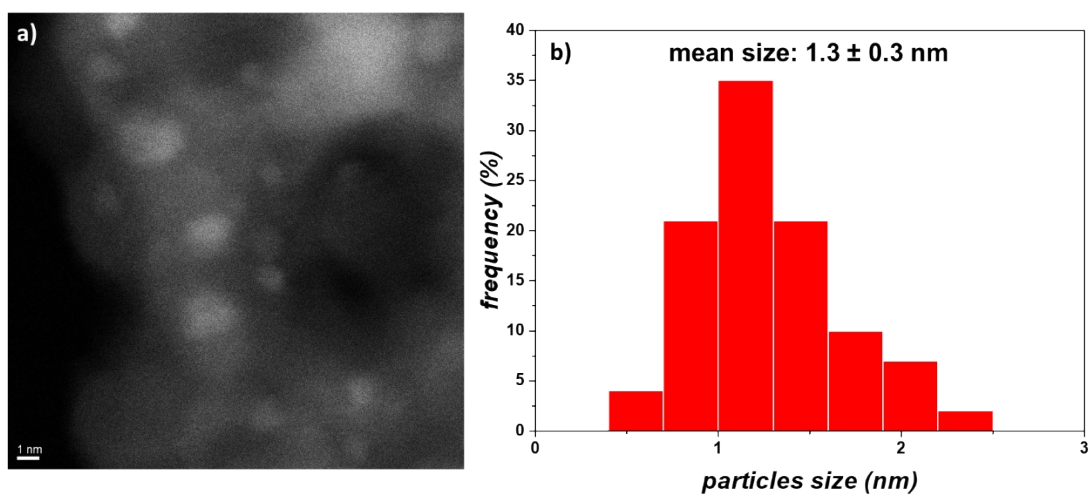

**Figure S5.** The HAADF-STEM image (a) and copper particle size distribution (b) for CuO/Al<sub>2</sub>O<sub>3</sub> synthesized with incipient wetness impregnation.

Figure S6

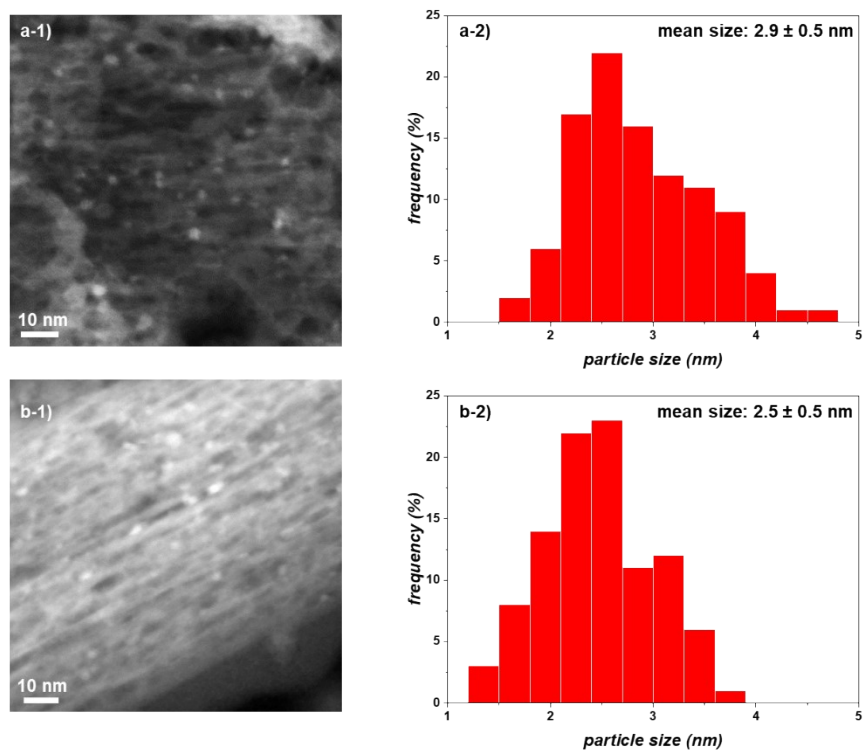

Figure S6. The HAADF-STEM image and the particle size distribution of ZnO-CuO: a) PCVD and b) IMP samples.

Figure S7

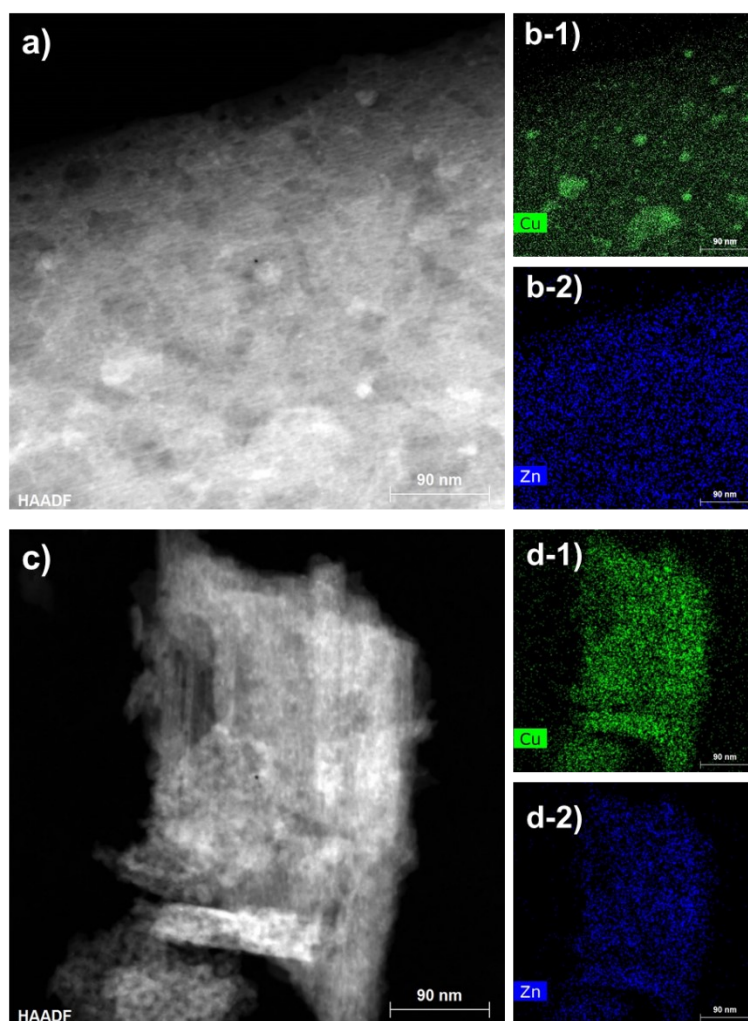

**Figure S7.** HAADF-STEM images of fresh ZnO-Cu/Al<sub>2</sub>O<sub>3</sub> catalysts synthesized with PCVD (a) and IMP (b) methods and the corresponding elemental mappings of copper (b-1 and d-1) and zinc (b-2 and d-2) in these samples.

**Figure S8**

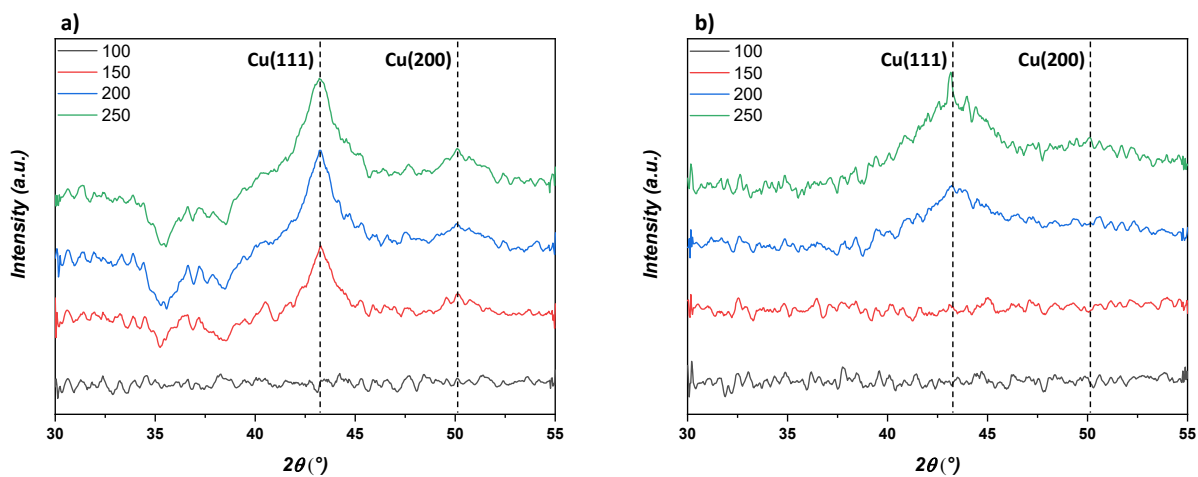

**Figure S8.** *In-situ* XRD patterns of ZnO/Cu/Al<sub>2</sub>O<sub>3</sub> catalysts after subtraction of pattern obtained at 50°C, synthesized by a) preferential chemical vapor deposition and b) successive incipient wetness impregnation methods during pretreatment with 20 vol. % of hydrogen in helium. The dashed lines indicate the position of copper (111) and (200) reflections.

Figure S9

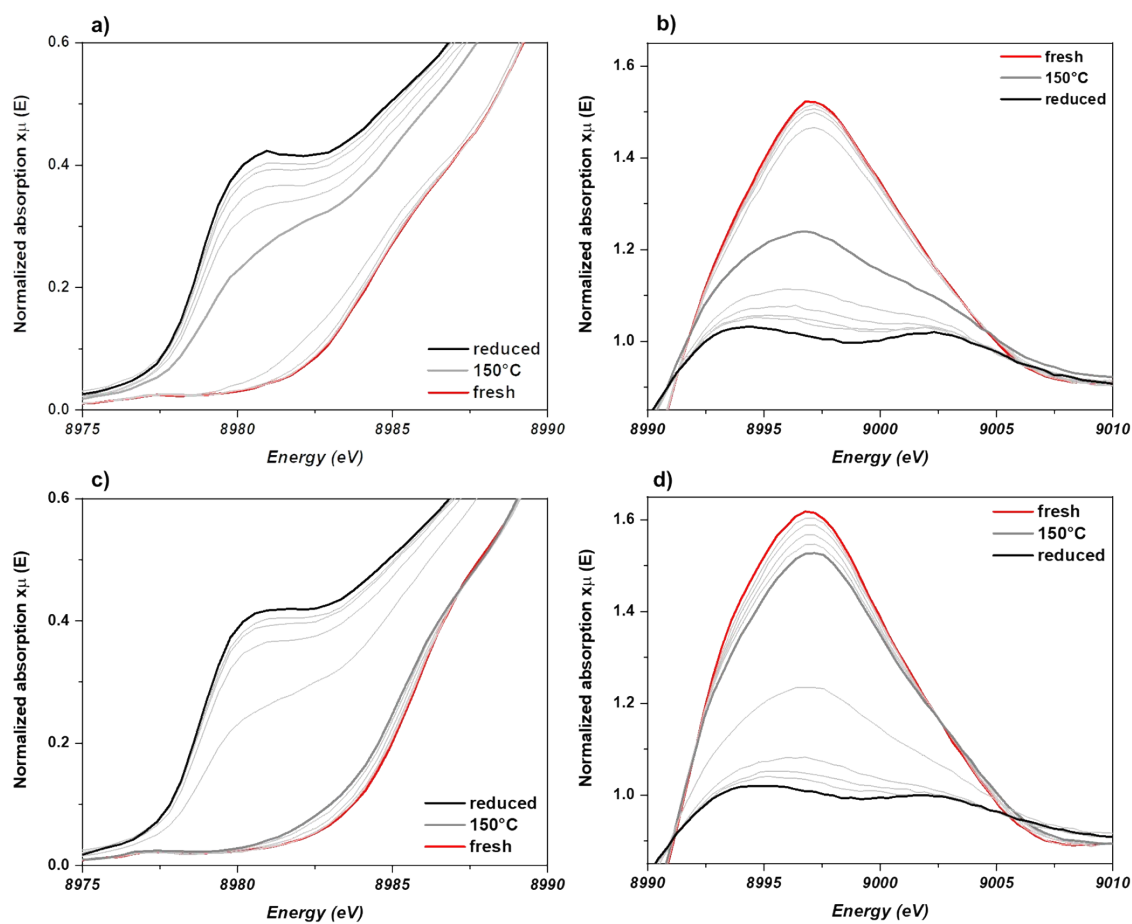

**Figure S9.** The details of the normalized *in-situ* copper *K*-edge XANES spectra: a) pre-edge and b) white line features of PCVD sample, and c) pre-edge and d) white line features of IMP sample during temperature programmed reduction. The red curves were derived from the fresh catalyst at ambient temperature, and the black curves were obtained after 1 hour reduction under 25 vol. % of hydrogen in helium flow at 250°C. The grey curves show intermediary spectra taken at 25°C intervals within this temperature range.

Figure S10

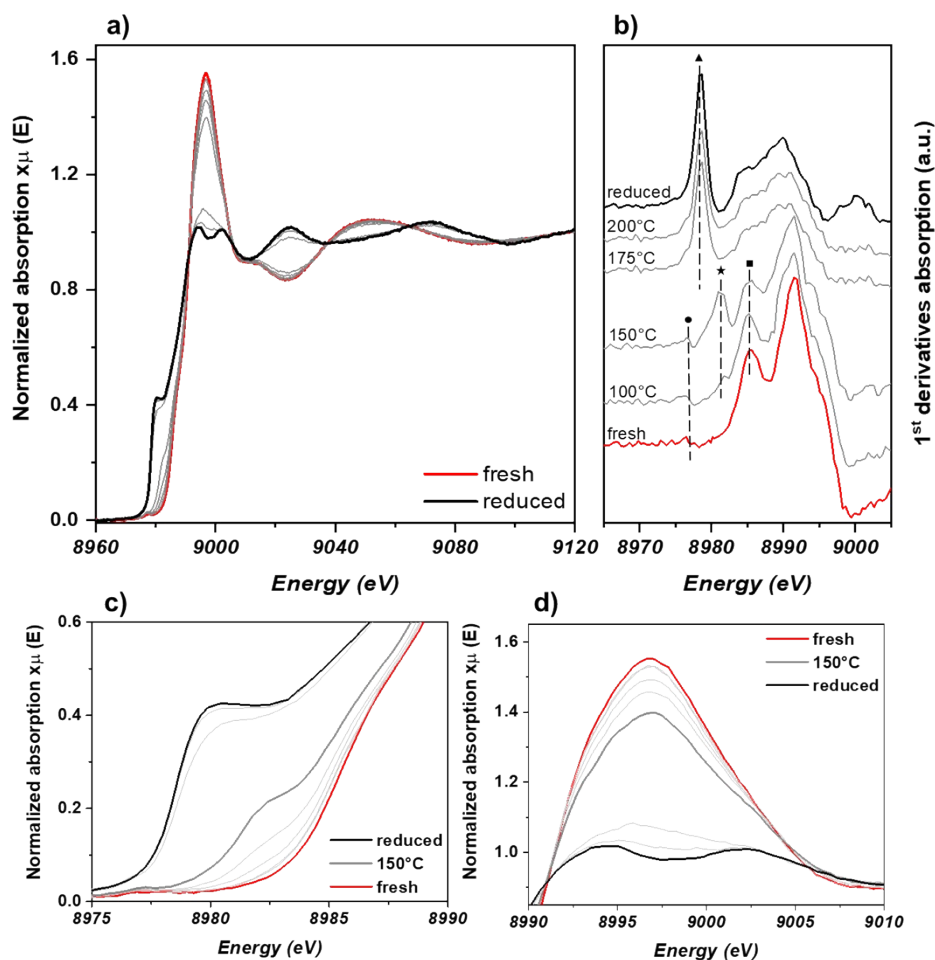

**Figure S10.** a) Normalized *in-situ* copper *K*-edge XANES spectra of Cu/Al<sub>2</sub>O<sub>3</sub> obtained during temperature programmed reduction, b) corresponding XANES first derivative, c) pre-edge of XANES spectra, and d) white line of XANES spectra. The red curves were derived from the fresh catalyst at ambient temperature, and the black curves were obtained after 1 hour reduction under 25 vol. % of hydrogen in helium flow at 250°C. The grey curves show intermediary spectra taken at 25°C intervals within this temperature range. Triangle: edge position of Cu<sup>0</sup>, Circle: position of pre-edge peak, Square: *1s-4p* transition with shakedown contributions in tetragonal Cu<sup>2+</sup>, Star: edge position of Cu<sup>1+</sup>.

Figure S11

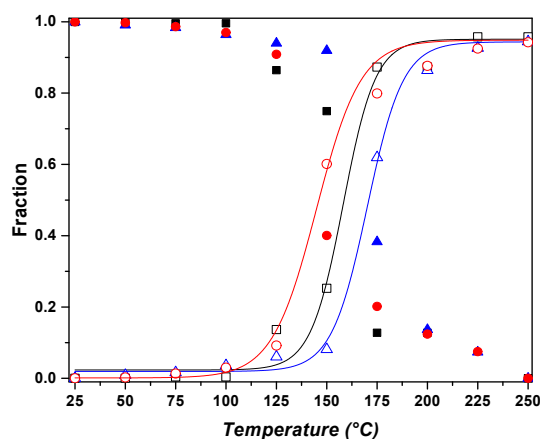

**Figure S11.** Results of PCA/LCF analyses of the Cu *K*-edge XANES obtained in each of the three catalysts studied during TPR under 25 vol. % hydrogen flow in helium. Filled symbols = Cu<sup>2+</sup>; open symbols = Cu<sup>0</sup>. Black = CA; red = PCVD; blue = IMP. In each case the lines fitted to the data are only to guide the eye. The errors in concentrations returned from PCA and LCF analysis is  $\pm 1\%$  in all cases.

Figure S12

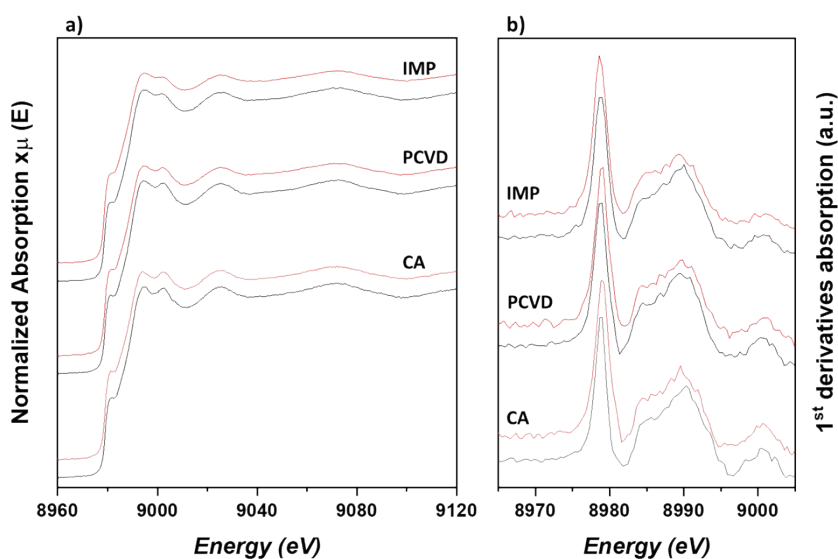

**Figure S12.** Normalized *in-situ* copper *K*-edge XANES spectra (a) and corresponding XANES first derivatives (b) derived from reduced CA, PCVD, and IMP catalysts (at 250°C under 25 vol. % of hydrogen in helium); before (black) and after pressurizing to 15 bar (red).

**Figure S13**

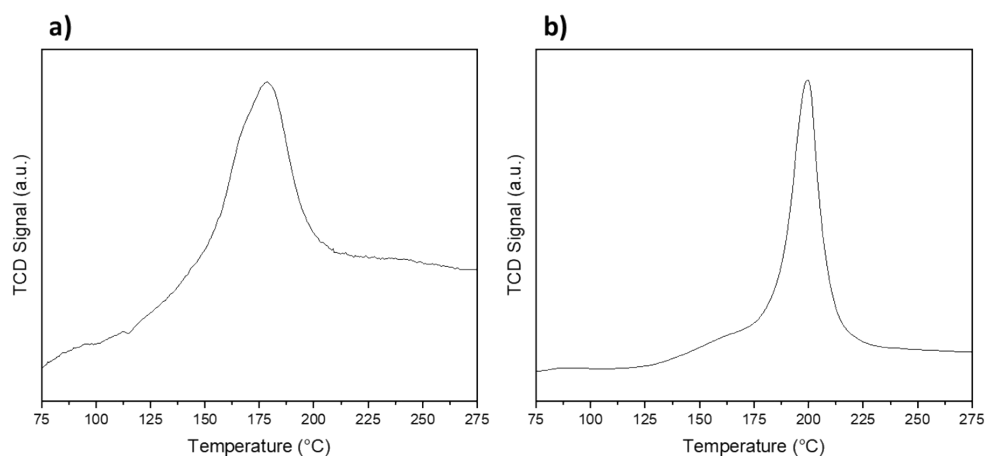

**Figure S13.** The H<sub>2</sub>-TPR experiment for a) PCVD and b) IMP samples.

**Figure S14**

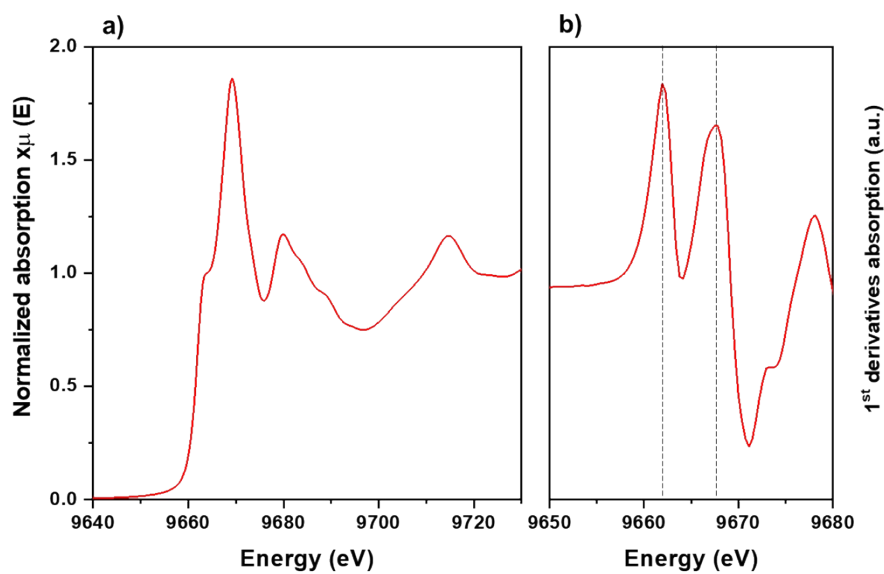

**Figure S14.** a) Normalized zinc *K*-edge XANES spectra and b) corresponding first derivative of wurtzite zinc oxide; the main peak and shoulder of wurtzite zinc oxide are marked with dashed lines in first derivative.



Figure S15

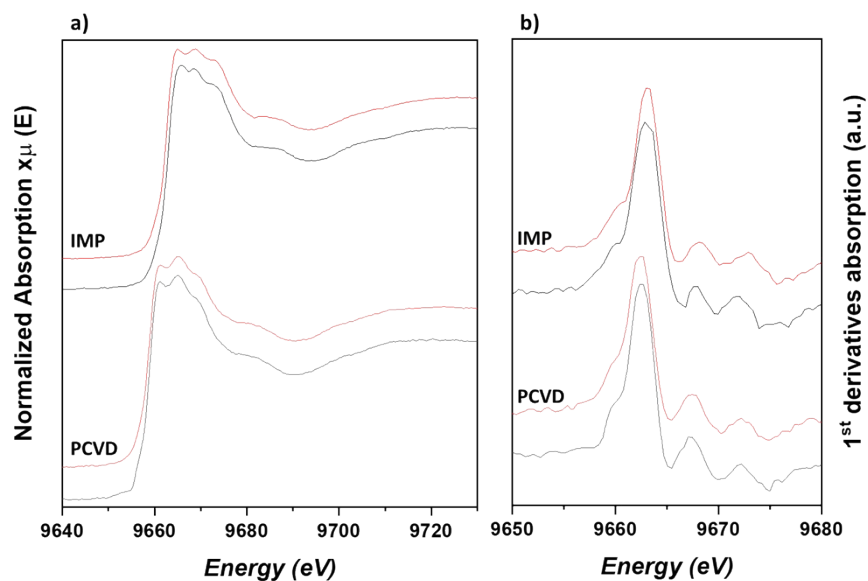

Figure S15. Normalized *in-situ* zinc *K*-edge XANES spectra (a) and corresponding XANES first derivatives (b) derived from reduced PCVD and IMP catalysts (at 250°C under 25 vol. % of hydrogen in helium); before (black) and after pressurizing to 15 bar (red).

Figure S16

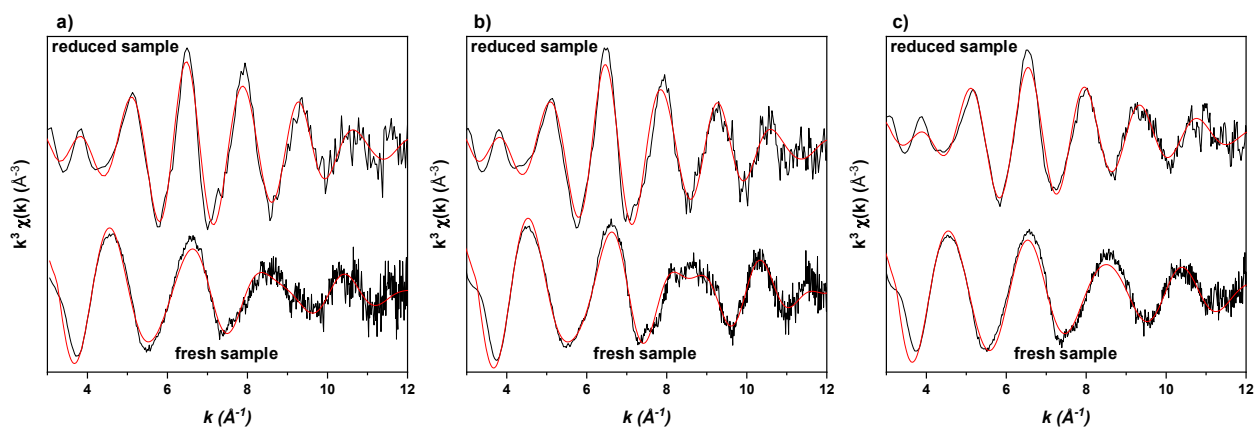

Figure S16. The  $k^3$ -weighted copper *K*-edge EXAFS derived from a) CA, b) PCVD, and c) IMP catalysts, for the fresh (ambient temperature) and reduced (250°C for 1 hour under 25 vol. % of hydrogen in helium). Black lines: experiment and red lines: theoretical fits.

Figure S17

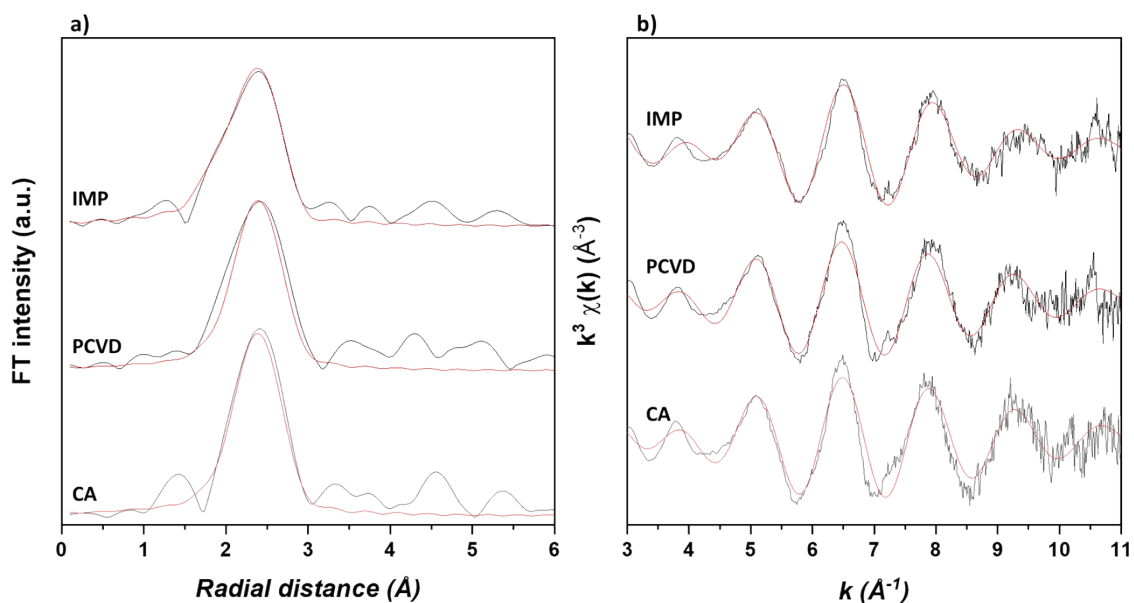

Figure S17. The Fourier transforms (a) and  $k^3$ -weighted copper  $K$ -edge EXAFS (b) derived from CA, PCVD, and IMP catalysts; pressurized to 15 bar after reduction (at 250°C under 25 vol. % of hydrogen in helium). Black lines: experiment and red lines: theoretical fits.

Figure S18

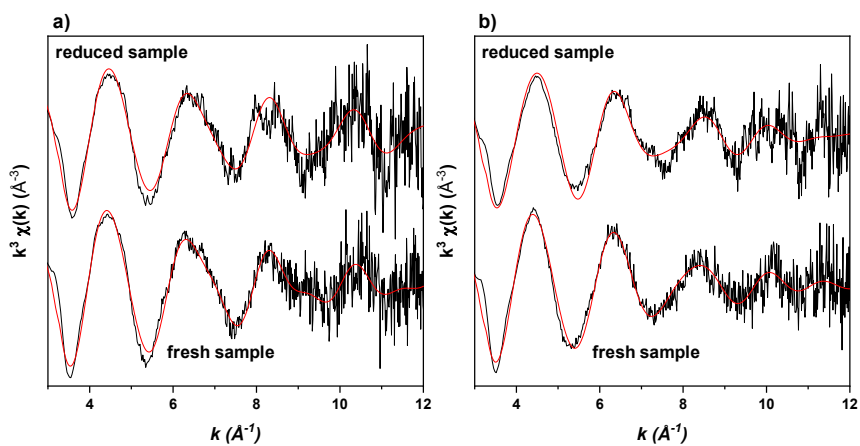

Figure S18. The  $k^3$ -weighted zinc  $K$ -edge EXAFS derived from a) PCVD and b) IMP catalysts, for the fresh (ambient temperature) and reduced (250°C for 1 hour under 25 vol. % of hydrogen in helium). Black lines: experiment and red lines: theoretical fits.

Figure S19

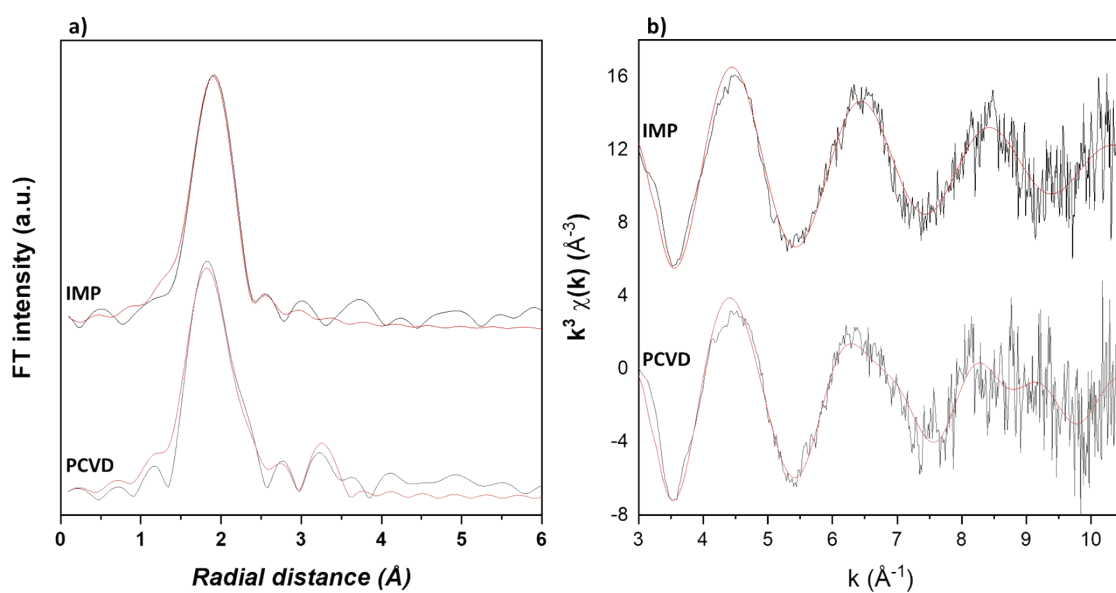

**Figure S19.** The Fourier transforms (a) and  $k^3$ -weighted zinc K-edge EXAFS (b) derived from PCVD and IMP catalysts; pressurized to 15 bar after reduction (at 250°C under 25 vol. % of hydrogen in helium). Black lines: experiment and red lines: theoretical fits.
